# Supplementary material for: Effective surface attachment of Ag nanoparticles on fibers using glycidyltrimethylammonium chloride and improvement of antimicrobial properties
Source: Royal Society of Chemistry journal article supplement (doi:10.1039/c7ra01636k), 2017-01-01
Supplement: c7ra01636k1.pdf [file c7ra01636k1.pdf]

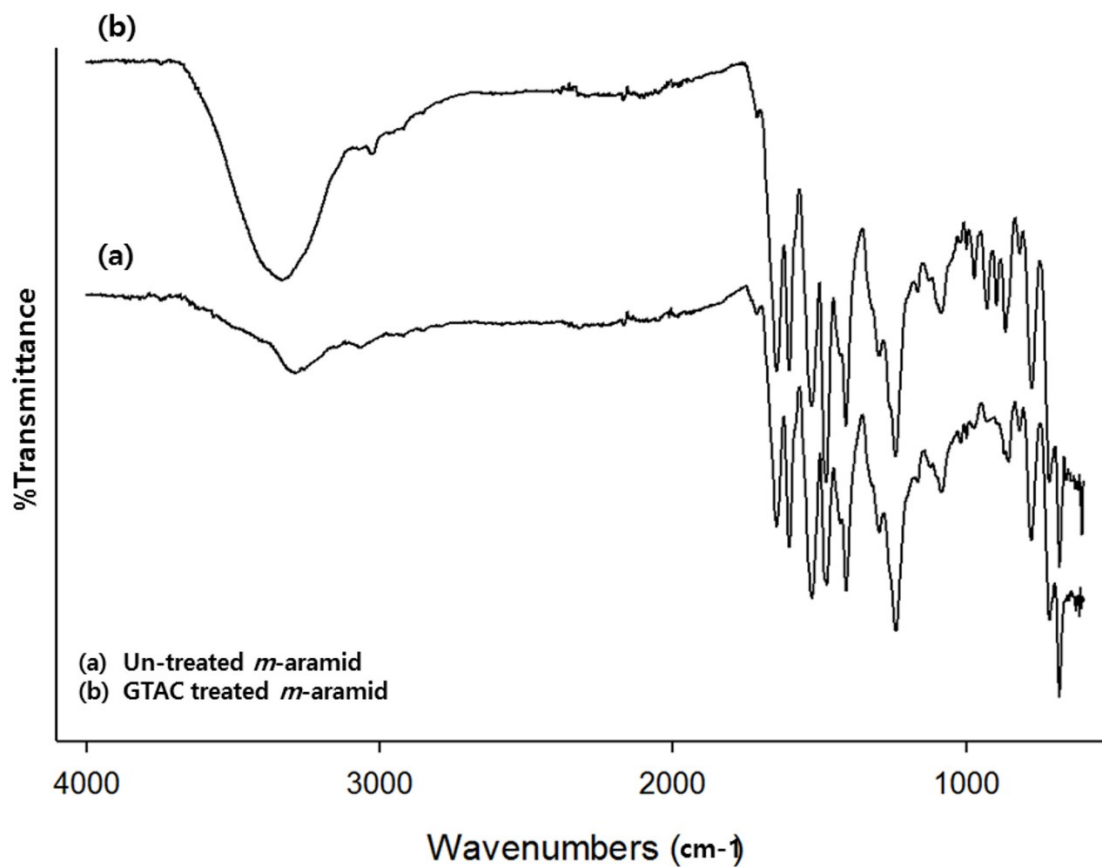

**Supplementary Information 1.** FR-IR analysis with (a) untreated *m*-aramid and (b) GTAC treated *m*-aramid fibers.
